# Supplementary material for: Use of alcohols as reducing agents for synthesis of well-defined polymers by AGET-ATRP
Source: Royal Society of Chemistry journal article supplement (doi:10.1039/c2cc17525h), 2012-01-01
Supplement: c2cc17525h.pdf [file c2cc17525h.pdf]

## Electronic Supplementary Information

for

### Use of Alcohols as Reducing Agent for Synthesis of Well-Defined Polymers by AGET-ATRP

Yanxue Wang, Xinle Li, Fanfan Du, Hansen Yu, Bangkun Jin, Ruke Bai\*

*CAS Key Laboratory of Soft Matter Chemistry, Department of Polymer Science and Engineering, University of Science and Technology of China, Hefei, P. R. China 230026.*

*E-mail: [bairk@ustc.edu.cn](mailto:bairk@ustc.edu.cn)*

*Tel: 0086-551-3600722; Fax: 0086-551-3631760*

#### Experimental Section

**Materials.** All chemicals and reagents were purchased commercially unless otherwise stated. Methyl acrylate (MA), tert-butyl acrylate (<sup>t</sup>BA), and styrene (St) were purified via column chromatography with basic alumina before use. 1-Bromoethylbenzene (PEBr), copper(II) bromide, alcohols, 2,2'-bipyridyl (bpy), and anisole were used as received.

**Instrumentation.** <sup>1</sup>H NMR spectra were recorded at room temperature on a Bruker AVANCE II spectrometer operating at 400 MHz. CDCl<sub>3</sub> and dimethyl sulfoxide (DMSO)-d<sub>6</sub> were used as solvents. The chemical shifts were referenced relative to the solvents. The number average molecular weights ( $M_n$ ) and polydispersities ( $M_w/M_n$ ) were measured by gel permeation chromatography (GPC) on a Waters 150 instrument equipped with 10<sup>3</sup>, 10<sup>4</sup> and 10<sup>5</sup> Å Waters Ultrastyrigel columns and using THF (1.0

mL / min) as the eluent. Calibration was against polystyrene standards. UV-Vis spectra of solutions were recorded with a Pgeneral UV-Vis TU-1901 spectrometer.

**Reduction of CuBr<sub>2</sub>/bpy by Alcohols.** A typical procedure for the reduction of CuBr<sub>2</sub>/bpy was as follows. A mixture of CuBr<sub>2</sub> (2.45 mg, 11 μmol), bpy (5.15 mg, 33 μmol), ethylene glycol (2.20 mg, 35 μmol), and DMF (4 mL) was added to a glass tube. The solution was degassed by three cycles of freezing-pumping-thawing. Then, the tube was sealed under vacuum and the solution was stirred at 75 °C for a prescribed time. After the reaction, the reaction mixture was characterized immediately by UV-Vis spectra.

**AGET-ATRP with Alcohols as Reducing Agents.** A typical procedure for the AGET-ATRP of MA was as follows. PEBr (20 mg, 0.11 mmol), MA (1 mL, 11 mmol), CuBr<sub>2</sub> (24.5 mg, 0.11 mmol), bpy (34.5 mg, 0.22 mmol), ethylene glycol (22.0 mg, 0.35 mmol), Na<sub>2</sub>CO<sub>3</sub> (16 mg, 0.16 mmol), and anisole (0.5 mL) were charged into a 5 mL tube and, after being degassed by three freeze-vacuum-thaw cycles, the tube was sealed under vacuum. The tube was held in an oil bath at a temperature of 75 °C for a prescribed time and, after polymerization, the reaction mixture was dissolved in THF. Subsequently the solution was passed through a neutral alumina column and then precipitated in petroleum ether for three times. The precipitate was collected by filtration and dried in vacuo at 40 °C. The conversion of MA was determined gravimetrically. The molecular weight was measured by GPC and <sup>1</sup>H NMR.

**Extension of PMA Macroinitiator with <sup>t</sup>BA via Glycol-based AGET-ATRP.** A PMA macroinitiator ( $M_n$ , 7700;  $M_w/M_n$ , 1.19) (0.85 g, 0.11 mmol) prepared by AGET-ATRP was dissolved in anisole (2 mL) in a 5 mL tube. The tube was then charged with <sup>t</sup>BA (1.4 g, 11 mmol), CuBr<sub>2</sub> (24.5 mg, 0.11 mmol), bpy (34.5 mg, 0.22 mmol), ethylene glycol (22.0 mg, 0.35 mmol), Na<sub>2</sub>CO<sub>3</sub> (16 mg, 0.16 mmol). After being degassed by three freeze-vacuum-thaw cycles, the tube was sealed under vacuum. The tube was held in an oil bath at a temperature of 75 °C for 25 h and, after polymerization, the reaction mixture was dissolved in THF. Subsequently the solution was passed through a neutral alumina column and then precipitated in a large excess of petroleum ether for three times. The precipitate was collected by filtration and dried in vacuo at 40 °C. Yield, 1.11 g;  $M_n$ , 11200;  $M_w/M_n$ , 1.25.

**General Procedure for AGET-ATRP of MA in the Presence of a Limited Amount of Air.** The polymerization was carried out in a sealed tube. PEBr (40 mg, 0.22 mmol), MA (2 ml, 22 mmol), CuBr<sub>2</sub> (49 mg, 0.22 mmol), bpy (69 mg, 0.44 mmol), ethylene glycol (44 mg, 0.70 mmol), Na<sub>2</sub>CO<sub>3</sub> (32 mg, 0.32 mmol), and anisole (1 mL) were charged into a 5 mL tube and the tube was sealed under air. The tube was held in the oil bath at a temperature of 75 °C for 45 h and, after polymerization, the reaction mixture was dissolved in THF. Subsequently the solution was passed through a neutral alumina column and then precipitated in petroleum ether for three times. The polymer was obtained by filtration and dried in vacuo at 40 °C. Conversion, 75.2%;  $M_n$ , 6800;  $M_w/M_n$ , 1.12.

## Legends and Tables

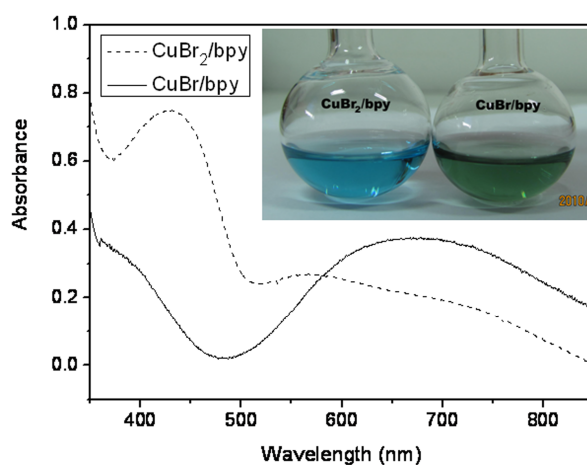

**Figure S1.** UV-Vis spectra of CuBr<sub>2</sub>/bpy and ethylene glycol in DMF before (----) and after (—) the redox reaction. Condition: the tube was sealed under vacuum and heated at 75 °C for 5 h. Inset: photos taken before and after the reaction.

**Table S1.** AGET-ATRP of MA in anisole using simple alcohols as reducing agents<sup>a</sup>

| entry | alcohol         | conv <sup>b</sup><br>(%) | M <sub>n,th</sub> <sup>c</sup><br>(g/mol) | M <sub>n,GPC</sub> <sup>d</sup><br>(g/mol) | M <sub>w</sub> /M <sub>n</sub> <sup>d</sup> |
|-------|-----------------|--------------------------|-------------------------------------------|--------------------------------------------|---------------------------------------------|
| 1     | methanol        | 35.4                     | 3200                                      | 3400                                       | 1.25                                        |
| 2     | ethanol         | 20.6                     | 2000                                      | 2400                                       | 1.32                                        |
| 3     | isopropanol     | 32.5                     | 3000                                      | 3300                                       | 1.25                                        |
| 4     | tert-butanol    | 0                        | -                                         | -                                          | -                                           |
| 5     | ethylene glycol | 28.7                     | 2500                                      | 2800                                       | 1.21                                        |
| 6     | 1,4-butanediol  | 48.5                     | 4400                                      | 4500                                       | 1.29                                        |
| 7     | glycerol        | 22.7                     | 2100                                      | 2400                                       | 1.30                                        |

<sup>a</sup> Conditions: MA/PEBr/CuBr<sub>2</sub>/bpy/glycol/Na<sub>2</sub>CO<sub>3</sub> = 200/2/2/4/6/3, [MA]<sub>0</sub> = 7.4 M, temperature = 70 °C, time = 20 h; <sup>b</sup> Determined gravimetrically; <sup>c</sup> Calculated from the equation: M<sub>n,th</sub> = Conversion × 100 × 86 + 185; <sup>d</sup> Determined by GPC.

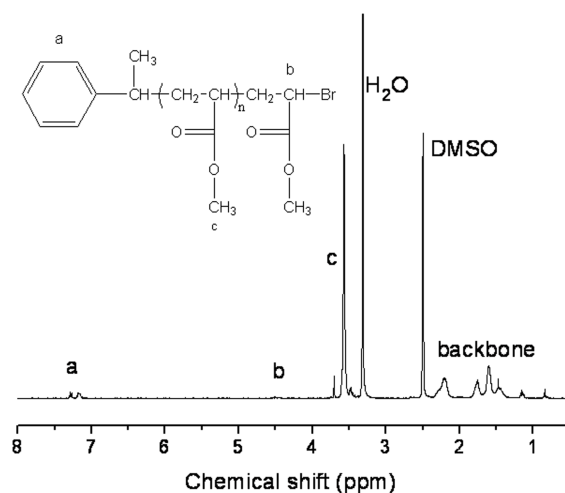

**Figure S2.** <sup>1</sup>H NMR spectrum of PMA obtained from the AGET-ATRP of MA (Entry 10 in Table 1).

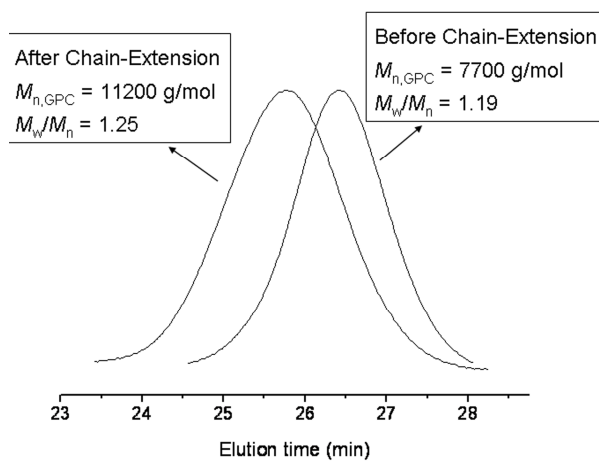

**Figure S3.** Chain extension of PMA as a macroinitiator with <sup>t</sup>BA via the ethylene glycol-based AGET-ATRP.

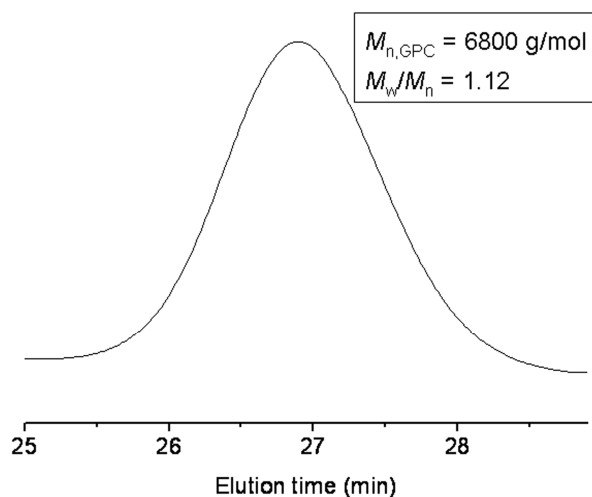

**Figure S4.** GPC curve of PMA obtained from the AGET-ATRP of MA in the presence of limited amount of air with conversion 75.2%. Condition:  $[MA]_0/[PEBr]_0/[CuBr_2]_0/[bpy]_0/[ethylene \text{ glycol}]/[Na_2CO_3] = 200/2/2/4/6/3$ ,  $[MA]_0 = 7.4 \text{ M}$ , temperature = 75 °C, time = 45 h.
